# Supplementary material for: Enhancing the biochemical growth of Haematococcus pluvialis by mitigation of broad-spectrum light stress in wastewater cultures
Source: Royal Society of Chemistry journal article supplement (doi:10.1039/d3ra01530k), 2023-01-01
Supplement: d3ra01530k1.pdf [file d3ra01530k1.pdf]

## ESI

### **Enhancing the Biochemical Growth of *Haematococcus pluvialis* through Mitigation of Broad-Spectrum Light Stress in Wastewater Cultures**

Megha Mourya<sup>1,#</sup>, Mohd. J. Khan<sup>1,#</sup>, Vandana Sirotiya<sup>1,2,#</sup>, Ankesh Ahirwar<sup>1,2</sup>, Benoit Schoefs<sup>2</sup>, Justine Marchand<sup>2</sup>, Sunita Varjani<sup>3,4</sup> and Vandana Vinayak<sup>1,\*</sup>

<sup>1</sup>Diatom Nanoengineering and Metabolism Laboratory (DNM), School of Applied science,  
Dr. Hari Singh Gour Central University, Sagar (MP) 470003, India.

<sup>2</sup>Metabolism, Bioengineering of Microalgal Metabolism and Applications (MIMMA),  
Biology of Organisms, Stress, Health and Environment, Le Mans University, IUML - FR  
3473 CNRS, Le Mans, France

<sup>3</sup>School of Energy and Environment, City University of Hong Kong, Tat Chee Avenue,  
Kowloon, 999077, Hong Kong

<sup>4</sup>Sustainability Cluster, School of Engineering, University of Petroleum and Energy Studies,  
Dehradun-248 007, Uttarakhand, India

\*Corresponding author: kapilvinayak@gmail.com

# Equally contributed first authors

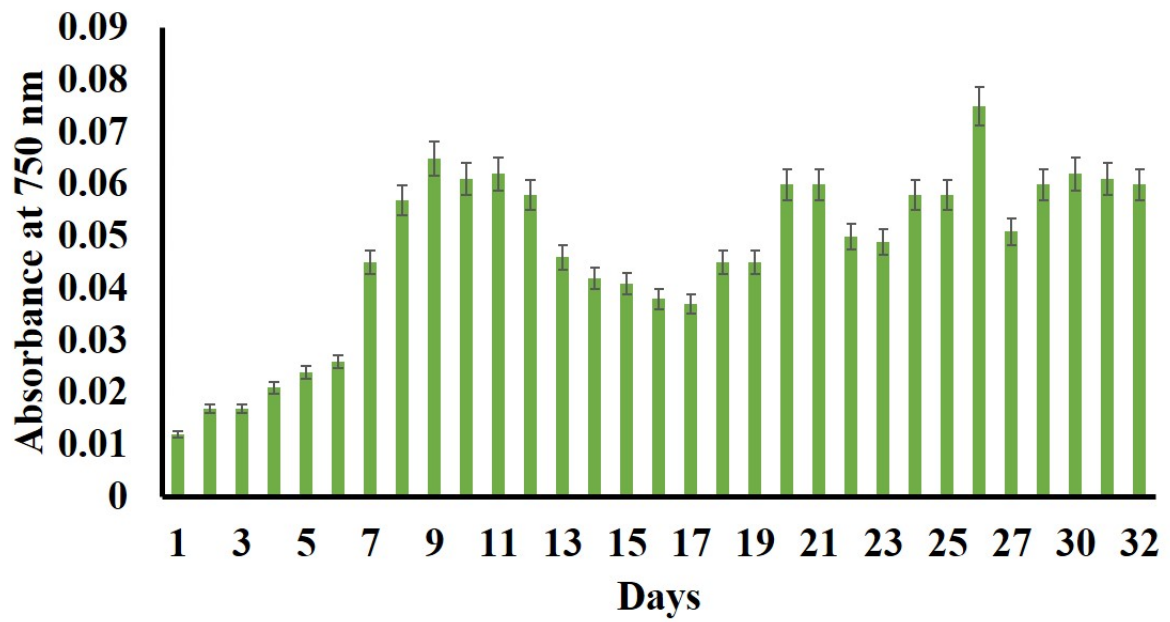

**Figure S1.** Optical density of *Haematococcus pluvialis* cells in a conical flask for 32 days at 750 nm

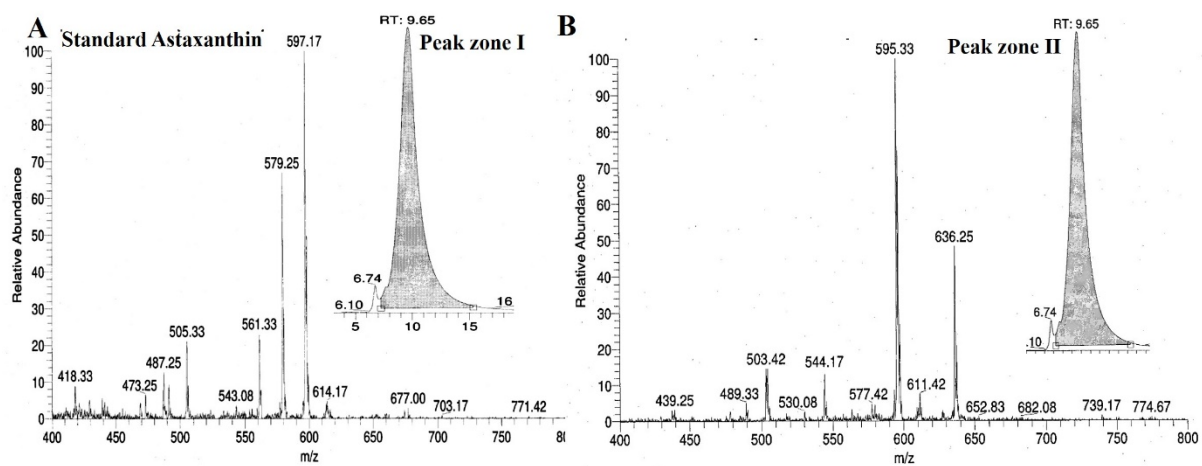

**Figure S2.** LCMS of astaxanthin standard at different ranges of its peak at RT 9.65

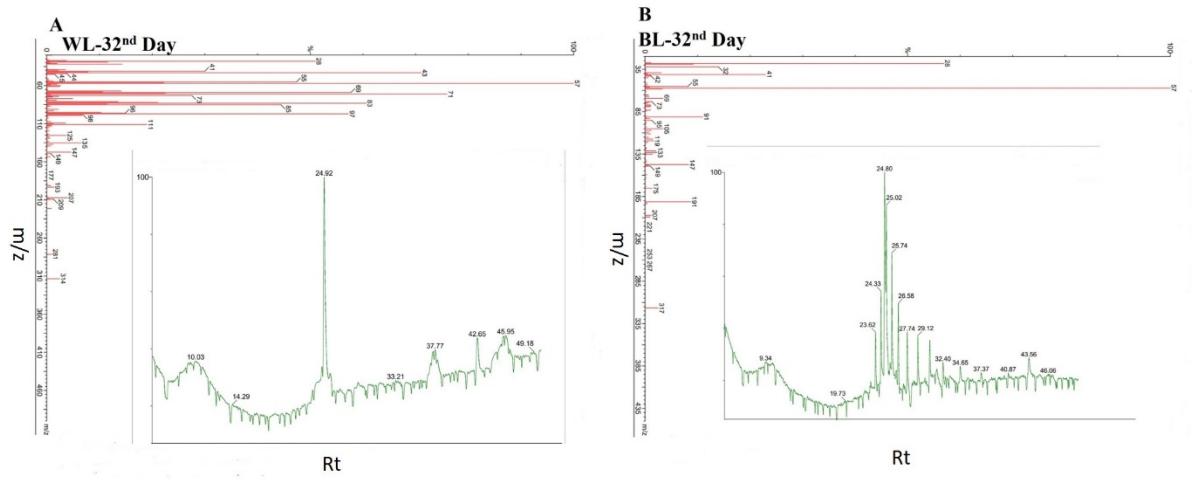

**Figure S3.** GCMS chromatogram of FAME of standard linseed oil at RT 36.60 and decanoic acid at RT 5.69
